# Supplementary material for: Microstructure tuned Na 3 V 2 (PO 4 ) 3 @C electrodes toward ultra-long-life sodium-ion batteries
Source: Royal Society of Chemistry journal article supplement (doi:10.1039/d4ra04221b), 2024-01-01
Supplement: d4ra04221b1.pdf [file d4ra04221b1.pdf]

## Electronic supplementary information (ESI)

### Microstructure tuned $\text{Na}_3\text{V}_2(\text{PO}_4)_3@C$ electrodes toward ultra-long life sodium-ion batteries

Ranjit S. Kate<sup>a,b</sup>, Kaustav Bhattacharjee<sup>b</sup>, Milind V. Kulkarni<sup>b</sup>, Ramesh J. Deokate<sup>a\*</sup>, Bharat B. Kale<sup>b,c\*</sup>, Ramchandra S. Kalubarme<sup>b\*</sup>

<sup>a</sup>*Vidya Pratishthan's Arts, Science and Commerce College, Vidyanagari, Baramati 413 133, India*

<sup>b</sup>*Centre for Materials for Electronics Technology, Panchavati, Off. Dr. Homi Bhabha Road, Pashan Pune -411 008, India.*

<sup>c</sup>*MIT World Peace University (MIT-WPU), Kothrud, Pune 411 038, India.*

**Corresponding Author:** Dr. Ramchandra S. Kalubarme, Email: [ram.kalubarme@cmet.gov.in](mailto:ram.kalubarme@cmet.gov.in)

Dr. Ramesh J. Deokate, Email: [rjdeokate@gmail.com](mailto:rjdeokate@gmail.com)

Dr. Bharat B. Kale, Email: [bbkale@cmet.gov.in](mailto:bbkale@cmet.gov.in)

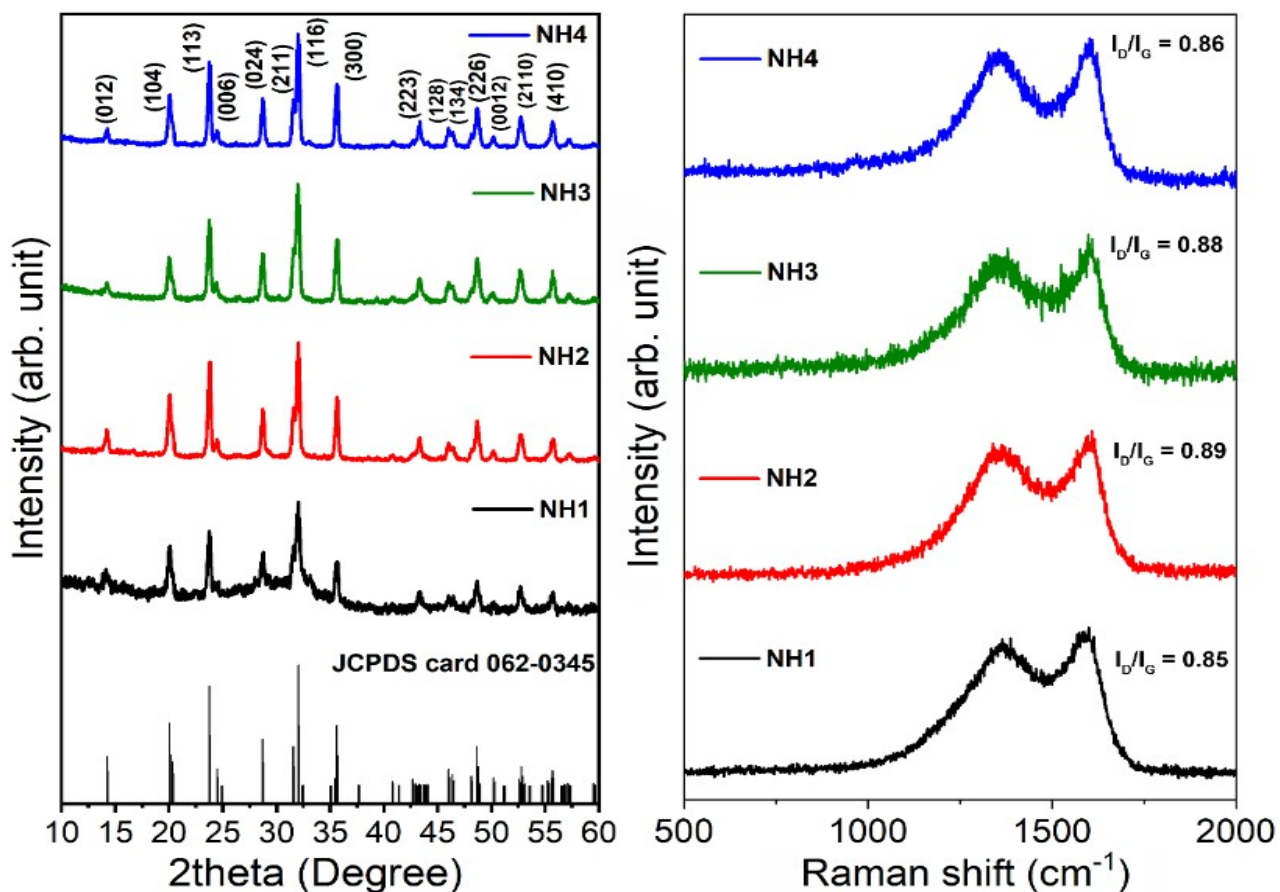

Fig. S1 (a) Powder X-ray diffraction patterns of different NVP@C samples along with the relevant JCPDS reference pattern. (b) Raman spectra of different NVP@C samples.

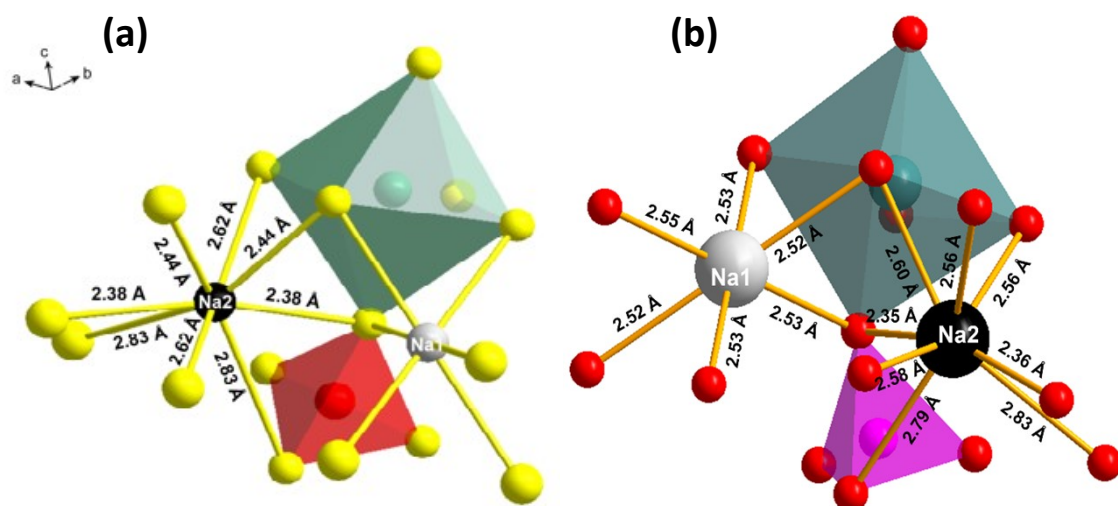

Fig. S2 (a) A representative molecular fragment showing different Na-sites and their coordination number (CN) of the standard  $\text{Na}_3\text{V}_2(\text{PO}_4)_3$  (COD: 2225132), (b)  $\text{Na}_3\text{V}_2(\text{PO}_4)_3$  sample calcined at  $850^\circ\text{C}$ .

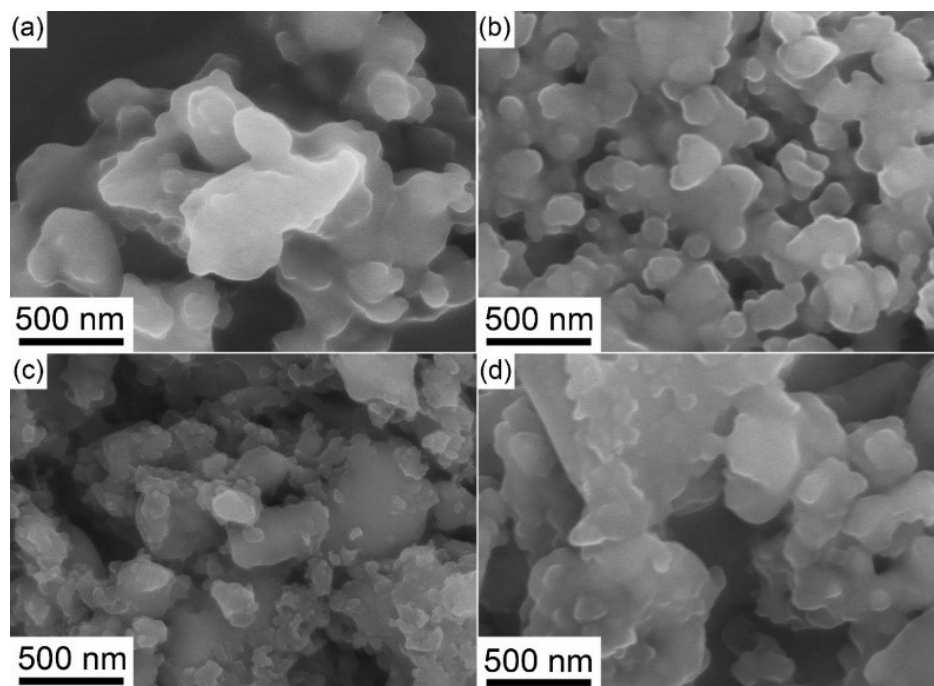

Fig. S3 FESEM images of NVP@C at different calcination temperatures: 750°C (a), 800°C (b), 850°C (c), and 900°C (d).

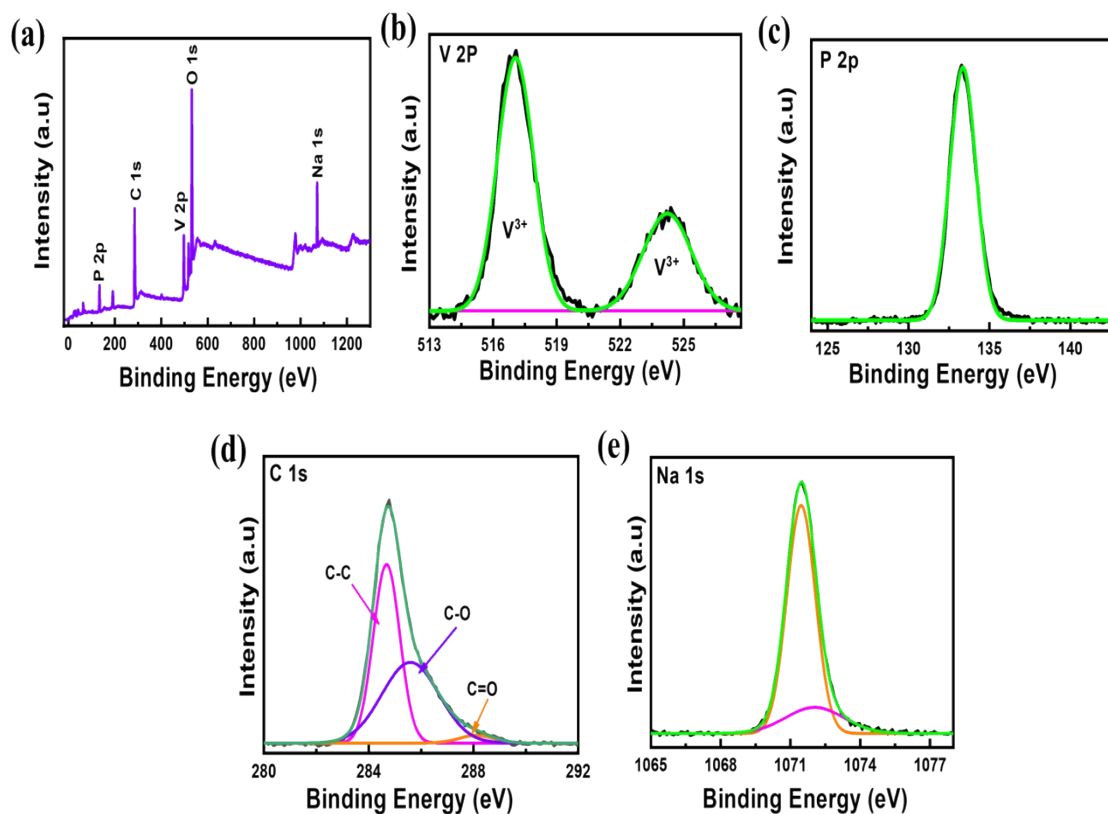

Fig. S4 XPS spectra of NVP@C calcined at 850°C (a) survey spectrum, (b) V 2p, (c) P 2p, (d) C 1s, and (e) Na 1s.

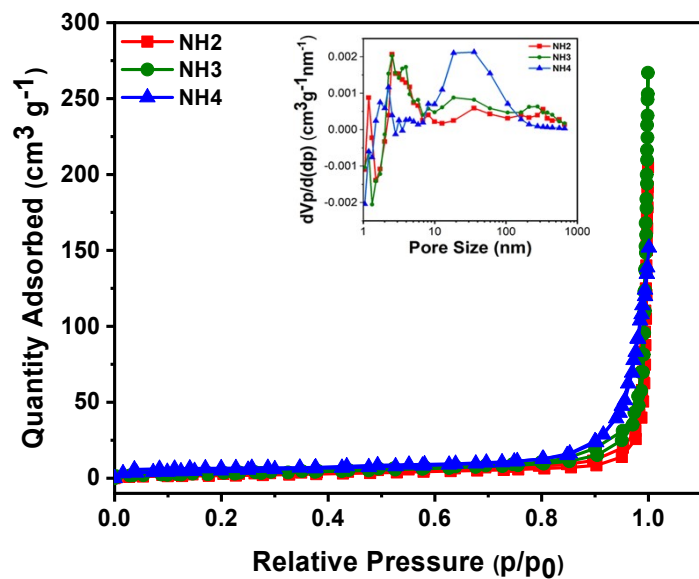

Fig. S5 N<sub>2</sub> Adsorption–desorption isotherm of NVP@C at different calcination temperatures.

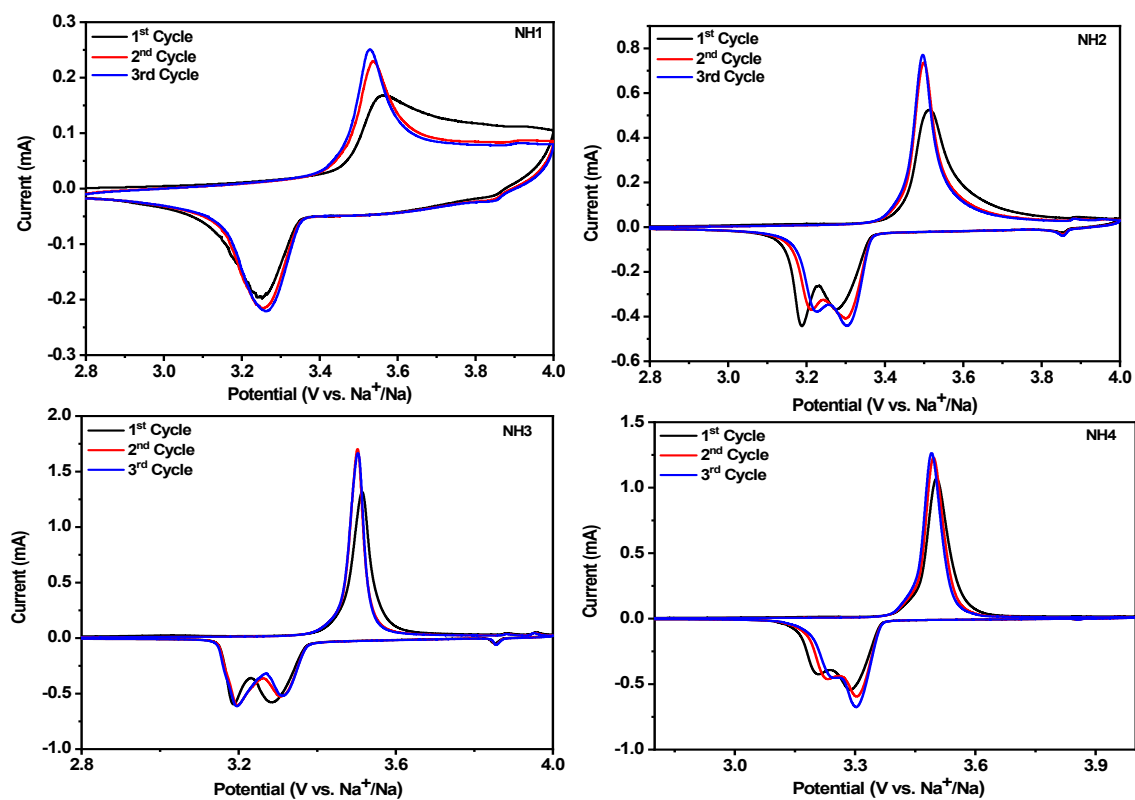

Fig.S6 CV curves of NVP@C at different calcination temperatures.

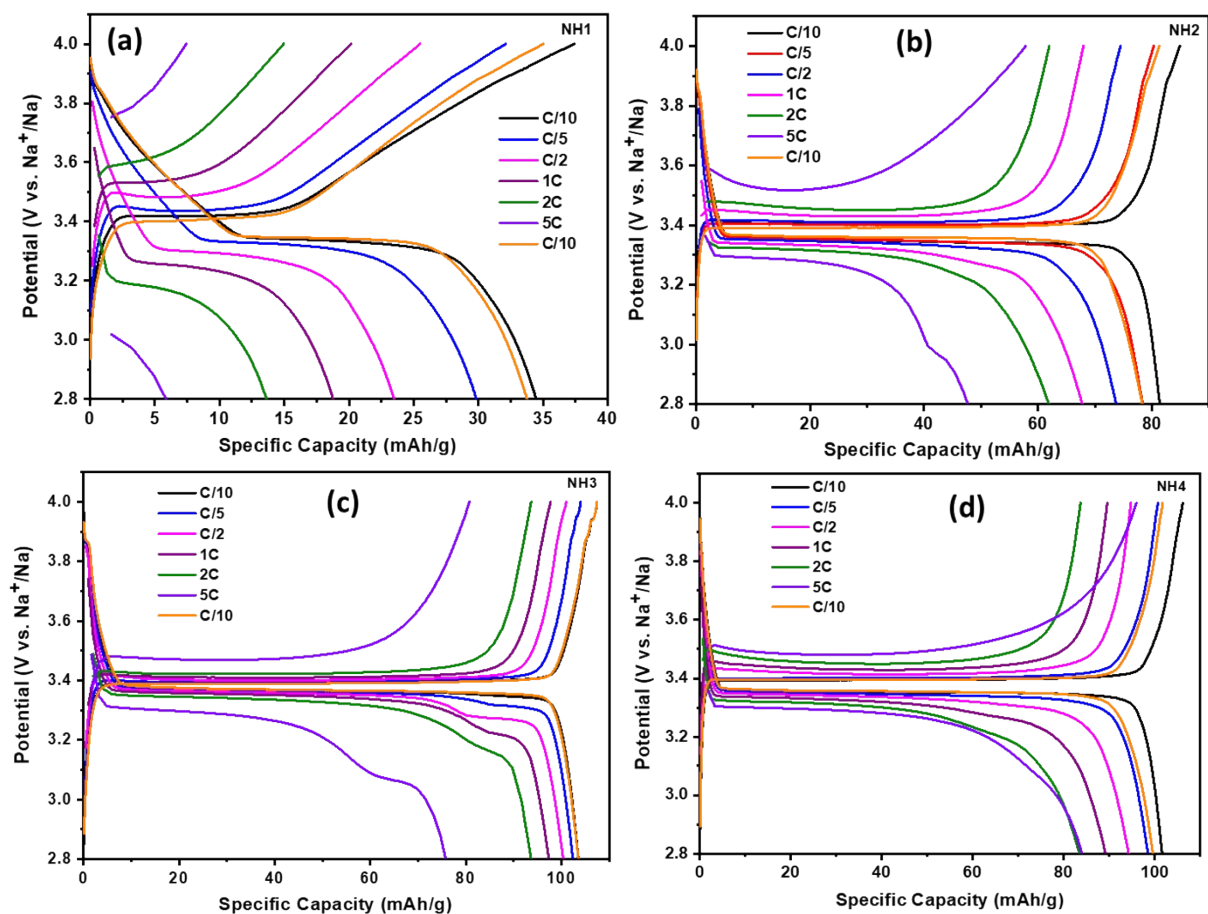

**Fig.S7** The first charge-discharge profiles at different current rates of NVP@C at different calcination temperatures in a potential range of 2.8–4.0 V vs. Na/Na<sup>+</sup> (a) 750, (b) 800, (c) 850 and (d) 900°C.

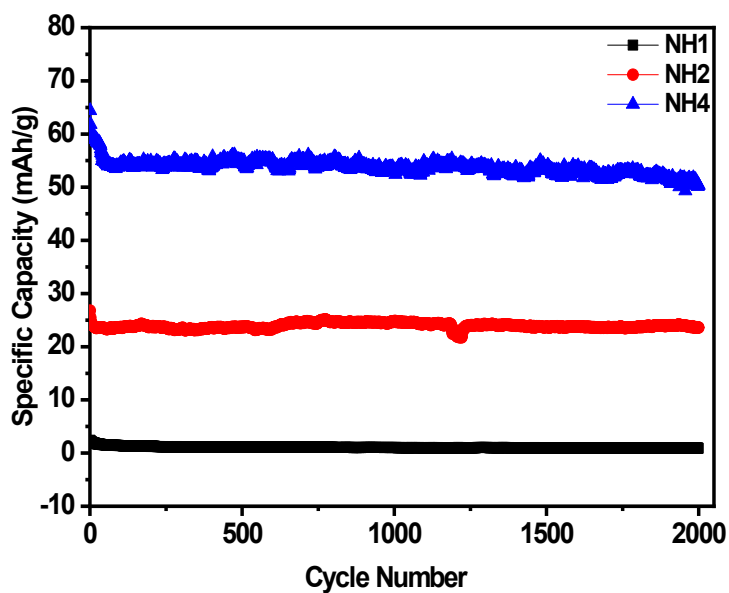

**Fig. S8** Cycling performance of NVP@C calcined at 750, 800 & 900°C.

**Table S1:** Different crystal structure parameters used in the PXRD refinement analysis for the NH3 sample.

| Symbol | Multiplicity | Wyckoff | x/a     | y/b    | z/c    | Occupancy |
|--------|--------------|---------|---------|--------|--------|-----------|
| Na1    | 6            | b       | 0.3333  | 0.6666 | 0.1667 | 0.8144    |
| Na2    | 18           | e       | 0.6667  | 0.9838 | 0.0833 | 0.7205    |
| O1     | 36           | f       | 0.1501  | 0.5012 | 0.0830 | 0.9783    |
| O2     | 36           | f       | 0.5594  | 0.8402 | 0.9744 | -0.0252   |
| P      | 18           | e       | -0.0363 | 0.3333 | 0.0833 | 1.0481    |
| V      | 12           | c       | 0.3333  | 0.6666 | 0.0169 | 0.9895    |

**Table S2.** BET surface area, pore radius, and pore volume of NVP@C for different calcination temperatures.

| Sample | Surface area (m <sup>2</sup> g <sup>-1</sup> ) | Average Pore radius (nm) | Pore Volume (cc g <sup>-1</sup> ) |
|--------|------------------------------------------------|--------------------------|-----------------------------------|
| NH2    | 9                                              | 48                       | 0.2254                            |
| NH3    | 13                                             | 46                       | 0.3020                            |
| NH4    | 17                                             | 24                       | 0.2091                            |

**Table S3.** Oxidation/reduction peaks and potential differences for different calcination temperatures.

| Temperature (°C) | Peak Position (V) 1 <sup>st</sup> cycle |             | Peak Position (V) 3 <sup>rd</sup> cycle |             | Potential difference (V) 1 <sup>st</sup> cycle | Potential difference (V) 3 <sup>rd</sup> cycle |
|------------------|-----------------------------------------|-------------|-----------------------------------------|-------------|------------------------------------------------|------------------------------------------------|
|                  | Oxidation                               | Reduction   | Oxidation                               | Reduction   |                                                |                                                |
| 750              | 3.55                                    | 3.24        | 3.52                                    | 3.26        | 0.31                                           | 0.26                                           |
| 800              | 3.51                                    | 3.28 & 3.19 | 3.49                                    | 3.30 & 3.22 | 0.23                                           | 0.19                                           |
| 850              | 3.51                                    | 3.28 & 3.18 | 3.50                                    | 3.31 & 3.19 | 0.23                                           | 0.19                                           |
| 900              | 3.50                                    | 3.29 & 3.20 | 3.49                                    | 3.30 & 3.23 | 0.21                                           | 0.19                                           |

**Table S4.** Comparison of Specific discharge capacities for the first four cycles at different C-rates and temperatures.

| Temperature (°C) | Specific Capacities (mAh g <sup>-1</sup> ) |         |       |       |       |       |      |
|------------------|--------------------------------------------|---------|-------|-------|-------|-------|------|
|                  | C/10                                       | C/5     | C/2   | 1C    | 2C    | 5C    | C/10 |
| 750              | 34                                         | 29      | 23    | 18    | 13    | 6-5   | 33   |
| 800              | 82-81                                      | 79-78   | 78-74 | 72-68 | 62    | 47-46 | 78   |
| 850              | 103                                        | 103-102 | 100   | 98-97 | 94-93 | 75    | 103  |
| 900              | 101                                        | 100-98  | 94    | 90-89 | 84-83 | 84-81 | 99   |

**Table S5.** The comparison of electrochemical performances of  $\text{Na}_3\text{V}_2(\text{PO}_4)_3$ -based cathode materials.

| Electrode                                                         | C-rate     | Discharge Capacity ( $\text{mAh g}^{-1}$ )<br>(Cycle Number) | Capacity Retention | Ref.                |
|-------------------------------------------------------------------|------------|--------------------------------------------------------------|--------------------|---------------------|
| NVP/C                                                             | 10C        | 63                                                           | -                  | [1]                 |
| NVP/C                                                             | 10C        | 62 (1) – 38 (3000)                                           | 62%                | [2]                 |
| NVP/C                                                             | 10C        | 84.4                                                         | -                  | [3]                 |
| NVP-C-B0.38%                                                      | 10C        | 87 (1) – 70 (50)                                             | 80.9%              | [4]                 |
| NVP/C nanowire                                                    | 1C         | 94 (1)-20 (50)                                               | 53.2%              | [5]                 |
| NVP/(C+G)                                                         | 5C         | 95.3 (1)-88.7 (200)                                          | 92.5%              | [6]                 |
| $\text{Na}_3\text{V}_2(\text{PO}_4)_3/\text{C}$                   | 10C        | $\approx 40$                                                 | -                  | [7]                 |
| $\text{Na}_3\text{V}_2(\text{PO}_4)_3/\text{C}$                   | 10C        | 25                                                           | -                  | [8]                 |
| NVP/G                                                             | 5C         | 86 (1)-70 (50)                                               | 70%                | [9]                 |
| $\text{Na}_3\text{V}_2(\text{PO}_4)_3/\text{C}$                   | 10C        | 92 (1)-72 (100)                                              | 77.8%              | [10]                |
| $\text{Na}_3\text{V}_2(\text{PO}_4)_3/\text{C}$                   | 1C         | 70 (1)-50 (200)                                              | 80%                | [11]                |
| $\text{Na}_3\text{V}_2(\text{PO}_4)_3/\text{C}$                   | 1C         | 100 (1)-45 (400)                                             | 45%                | [12]                |
| Br/N/a-C@NVP                                                      | 10C        | 40 (1)-32 (500)                                              | 92%                | [13]                |
| NVP@N-HC                                                          | 10C        | 93 (1)-67 (1000)                                             | 72%                | [14]                |
| 3D NVP@C                                                          | 5C         | 81 (1)-76 (200)                                              | 94.2%              | [15]                |
| NVP@C nanofiber                                                   | 2 C        | 77 (4)-75 (66)                                               | 97.4%              | [16]                |
| NVP@PEDOT                                                         | 1C         | 100 (1)-80 (200)                                             | 80%                | [17]                |
| Fe-NVP@C                                                          | 5C         | 91 (1)-43 (400)                                              | 46.7%              | [18]                |
| $\text{Na}_3\text{V}_2(\text{PO}_4)_3/\text{C}$                   | 10C        | 64 (1)-52 (1000)                                             | 81.5%              | [19]                |
| <b><math>\text{Na}_3\text{V}_2(\text{PO}_4)_3/\text{C}</math></b> | <b>10C</b> | <b>67 (1)-63 (2000)</b>                                      | <b>94%</b>         | <b>Current Work</b> |

### References:

- [1] H. Li, Y. Bai, F. Wu, Q. Ni, C. Wu,  $\text{Na}_3\text{V}_2(\text{PO}_4)_3/\text{C}$  nanorods as advanced cathode material for sodium ion batteries, *Solid State Ionics*, 2015, **278**, 281–286.
- [2] D. X. Wang, N. Chen, M. L. Li, C. Z. Wang, E. Helmut, X. F. Bie, Y. J. Wei, G. Chen, F. Du,  $\text{Na}_3\text{V}_2(\text{PO}_4)_3/\text{C}$  Composite as the Intercalation-Type Anode Material for Sodium-Ion Batteries with Superior Rate Capability and Long-Cycle Life, *J. Mater. Chem. A*, 2015, **3**, 8636-8642.
- [3] H. Wang, D.L. Jiang, Y. Zhang, G.P. Li, X.Z. Lan, H.H. Zhong, Z.P. Zhang, Y. Jiang, Self-combustion synthesis of  $\text{Na}_3\text{V}_2(\text{PO}_4)_3$  nanoparticles coated with carbon shell as cathode materials for sodium-ion batteries, *Electrochim. Acta*, 2015, **155**, 23–28.

- [4] W. Shen, H. Li, C. Wang, Z. H. Li, Q. J. Xu, H. M. Liu, Y. G. Wang, Improved Electrochemical Performance of the  $\text{Na}_3\text{V}_2(\text{PO}_4)_3$  Cathode by B-Doping of the Carbon Coating layer for Sodium-Ion Batteries, *J. Mater. Chem. A*, 2015, **3**, 15190-15201.
- [5] S. Kajiyama, J. Kikkawa, J. Hoshino, M. Okubo, E. Hosono, Assembly of  $\text{Na}_3\text{V}_2(\text{PO}_4)_3$  Nanoparticles Confined in a One-Dimensional Carbon Sheath for Enhanced Sodium-Ion Cathode Properties, *Chemistry A European Journal*, 2014, **20**, 12636-12640.
- [6] Z.L. Chu, C.B. Yue, Graphene oxide wrapped  $\text{Na}_3\text{V}_2(\text{PO}_4)_3/\text{C}$  nanocomposite as superior cathode material for sodium-ion batteries, *Ceram. Int.*, 2016, **42**, 820–827.
- [7] J. Liu, K. Tang, K. Song, P. A. van Aken, Y. Yu, and J. Maier, Electrospun  $\text{Na}_3\text{V}_2(\text{PO}_4)_3/\text{C}$  nanofibers as stable cathode materials for sodium-ion batteries, *Nanoscale*, 2014, **6**, 5081-5086.
- [8] H. Zhou, Z. Ryan Tian, S. S. Ang, Improving the cycling stability of  $\text{Na}_3\text{V}_2(\text{PO}_4)_3$  nanoparticle in aqueous sodium-ion batteries by introducing carbon support, *Mater Renew Sustain Energy*, 2016, **5**, 1-9.
- [9] D. Guo, J. Qin, Z. Yin, J. Bai, Y. Sun, M. Cao, Achieving high mass loading of  $\text{Na}_3\text{V}_2(\text{PO}_4)_3$ @carbon on carbon cloth by constructing three-dimensional network between carbon fibers for ultralong cycle-life and ultrahigh rate sodium-ion batteries, *Nano Energy*, 2018, **45**, 136-147.
- [10] H. Chen, Y. Huang, G. Mao, H. Tong, W. Yu, J. Zheng, and Z. Ding, Reduced Graphene Oxide Decorated  $\text{Na}_3\text{V}_2(\text{PO}_4)_3$  Microspheres as Cathode Material With Advanced Sodium Storage Performance, *Front. Chem.*, 2018, **6**, 1-8.
- [11] C. Huang, Z. Zuo, J. Deng, Q. Yao, Z. Wang, H. Zhou, Electrochemical Properties of Hollow Spherical  $\text{Na}_3\text{V}_2(\text{PO}_4)_3/\text{C}$  Cathode Materials for Sodium-ion Batteries, *Int. J. Electrochem. Sci.*, 2017, **12**, 9456 – 9464.
- [12] S. Tao, P. Cui, W. Huang, Z. Yu, X. Wang, S. Wei, D. Liu, L. Song, W. Chu, Sol-gel design strategy for embedded  $\text{Na}_3\text{V}_2(\text{PO}_4)_3$  particles into carbon matrices for high-performance sodium-ion batteries, *Carbon*, 2016, **96**, 1028-1033.
- [13] Z. Wang, J. Liu, Z. Du, H. Tao, and Y. Yue, Enhancing Na-ion storage in  $\text{Na}_3\text{V}_2(\text{PO}_4)_3/\text{C}$  cathodes for sodium-ion batteries through Br and N co-doping, *Inorg. Chem. Front.*, 2020, **7**, 1289-1297.
- [14] K. Sun, Y. B. Hu, X. D. Zhang, K. S. Hui, K. L. Zhang, G. G. Xu, J. Y. Ma, W. N. He, Doped Hard/Soft Double-Carbon-Coated  $\text{Na}_3\text{V}_2(\text{PO}_4)_3$  Hybrid-Porous Microspheres with Pseudocapacitive Behaviour for Ultrahigh Power Sodium-Ion Batteries, *Electrochim. Acta*, 2020, **335**, 135680-135692.



- [15] Q. Zhang, W. Wang, Y. J. Wang, P. Y. Feng, K. L. Wang, S. J. Cheng, K. Jiang, Controllable Construction of 3D-Skeleton-Carbon Coated  $\text{Na}_3\text{V}_2(\text{PO}_4)_3$  for High-Performance Sodium-Ion Battery cathode, *Nano Energy*, 2015, **20**, 11-19.
- [16] J. Liu, K. Tang, K. P. Song, A. V. A. Peter, Y. Yu, M. Joachim, Electrospun  $\text{Na}_3\text{V}_2(\text{PO}_4)_3/\text{C}$  Nanofibers as Stable Cathode Materials for Sodium-Ion. Batteries, *Nanoscale*, 2014, **6**, 5081-5086.
- [17] J. X. Zhang, T. C. Yuan, H. Y. Wan, J. F. Qian, X. P. Ai, H. X. Yang, Y. L. Cao, Surface-Engineering Enhanced Sodium Storage Performance of  $\text{Na}_3\text{V}_2(\text{PO}_4)_3$  Cathode via in-situ Self-Decorated Conducting Polymer Route, *Science China Chemistry* 2017, **60**, 1546-1553.
- [18] X. H. Liu, G. L. Feng, E. H. Wang, H. Chen, Z. G. Wu, W. Xiang, Y. J. Zhong, Y. X. Chen, X. D. Guo, B. H. Zhong, Insight into Preparation of Fe-Doped  $\text{Na}_3\text{V}_2(\text{PO}_4)_3@\text{C}$  from Aspects of Particle Morphology Design, Crystal Structure Modulation, and Carbon Graphitization Regulation, *ACS Appl. Mater. Interfaces.*, 2019, **11**, 12421-12430.
- [19] N. Li, Y. Tong, D. Yi, X. Cui, X. Zhang, 3D interconnected porous carbon-coated  $\text{Na}_3\text{V}_2(\text{PO}_4)_3/\text{C}$  composite cathode materials for sodium-ion batteries, *Ceramics International*, 2020, **46**, 27493-27498.
